# Supplementary material for: Chimeric Antigen Receptor-Glypican-3 T-Cell Therapy for Advanced Hepatocellular Carcinoma: Results of Phase I Trials
Source: Oxford University Press journal article supplement (doi:10.1158/1078-0432.ccr-19-3259), 2020-05-05
Supplement: 10780432ccr193259-sup-230153_3_supp_6246429_q958p5.docx [file 10780432ccr193259-sup-230153_3_supp_6246429_q958p5.docx]

**Supplementary Table S1.** Lymphodepletion regimens received by the HCC patients

| **Patient ID** | **Number of cycles** | **Drug** | **Dose (mg/day)** | **Dosea (mg/kg/day)** | **Duration (days)** |
| --- | --- | --- | --- | --- | --- |
| P1 | 1 | Cy | 2,000 | 24.4 | 1 |
| 2 | Cy | 1,000 | 12.2 | 2 |
| Flu | 50 | 0.6 | 3 |
| P2 | 1 | Cy | 600 | 13.3 | 2 |
| Flu | 40 | 0.9 | 2 |
| P3 | 1 | Cy | 1,000 | 13.9 | 3 |
| Flu | 50 | 0.7 | 4 |
| P4 | 1 | Cy | 1,100 | 17.5 | 1 |
| Cy | 900 | 14.3 | 1 |
| P6 | 1 | Cy | 700 | 14.7 | 2 |
| Flu | 40 | 0.8 | 3 |
| P7 | 1 | Cy | 750 | 13.2 | 2 |
| Flu | 46 | 0.8 | 2 |
| P8 | 1 | Cy | 750 | 16.7 | 3 |
| Flu | 40 | 0.9 | 2 |
| P9 | 1 | Cy | 1,000 | 13.3 | 2 |
| Flu | 45 | 0.6 | 4 |
| P10 | 1 | Cy | 750 | 14.2 | 1 |
| Flu | 35 | 0.7 | 4 |
| P11 | 1 | Cy | 850 | 13.1 | 2 |
| Flu | 35 | 0.5 | 4 |
| P12 | 1 | Cy | 750 | 16.7 | 2 |
| Flu | 35 | 0.8 | 3 |
| P13 | 1 | Cy | 950 | 12.5 | 2 |
| Flu | 40 | 0.5 | 3 |
| Abbreviations: Cy, cyclophosphamide; Flu, fludarabine.  aCalculated based on body weight.  NOTE: The lymphodepletion dose and duration were determined by the investigators based on the patients’ clinical conditions. Patient P5 was determined to be unfit for lymphodepletion due to poor clinical condition, with a heavy tumor burden and extremely elevated AFP level of 60,500 ng/mL. | | | | | |
