# Supplementary material for: Chimeric Antigen Receptor-Glypican-3 T-Cell Therapy for Advanced Hepatocellular Carcinoma: Results of Phase I Trials
Source: Oxford University Press journal article supplement (doi:10.1158/1078-0432.ccr-19-3259), 2020-05-05
Supplement: 10780432ccr193259-sup-230153_3_supp_6246430_q958q5.docx [file 10780432ccr193259-sup-230153_3_supp_6246430_q958q5.docx]

**Supplementary Table S2**. The previous therapies in patients on the study.

| Previous therapy | Patient ID and number of therapy (n) | | | | | | | | | | | | |
| --- | --- | --- | --- | --- | --- | --- | --- | --- | --- | --- | --- | --- | --- |
| P1 | P2 | P3 | P4 | P5 | P6 | P7 | P8 | P9 | P10 | P11 | P12 | P13 |
| Surgical resection | 1 | 1 | 1 | 5 | 2 | 1 | 1 | 1 | 1 |  | 1 | 1 |  |
| Interventional Radiotherapy |  | 5 |  | 2 | 4 | 1 | 5 |  |  | 1 |  | 2 | 1 |
| TACE | 5 |  |  | 5 |  |  |  |  | 3 | 3 | 4 | 1 | 5 |
| MWA | 4 |  |  |  |  |  | 3 | 3 | 1 | 2 | 6 |  | 11 |
| Interventional Chemotherapy |  |  | 3 |  |  |  |  | 2 |  |  |  |  |  |
| Sorafenib |  |  |  | 1 |  |  |  |  |  |  |  | 1 |  |
| Traditional Chinese medicine |  |  |  |  |  | 1 |  |  |  |  |  |  |  |
| Alcohol injection |  |  |  |  |  |  |  | 5 |  |  |  |  |  |

TACE, transcatheter arterial chemoembolization; MWA, microwave ablation.
